# Supplementary material for: Comparison of signal intensities and elemental fractionation in 257 nm femtosecond LA-ICP-MS using He and Ar as carrier gases
Source: Royal Society of Chemistry journal article supplement (doi:10.1039/c7ja00190h), 2017-01-01
Supplement: c7ja00190h1.pdf [file c7ja00190h1.pdf]

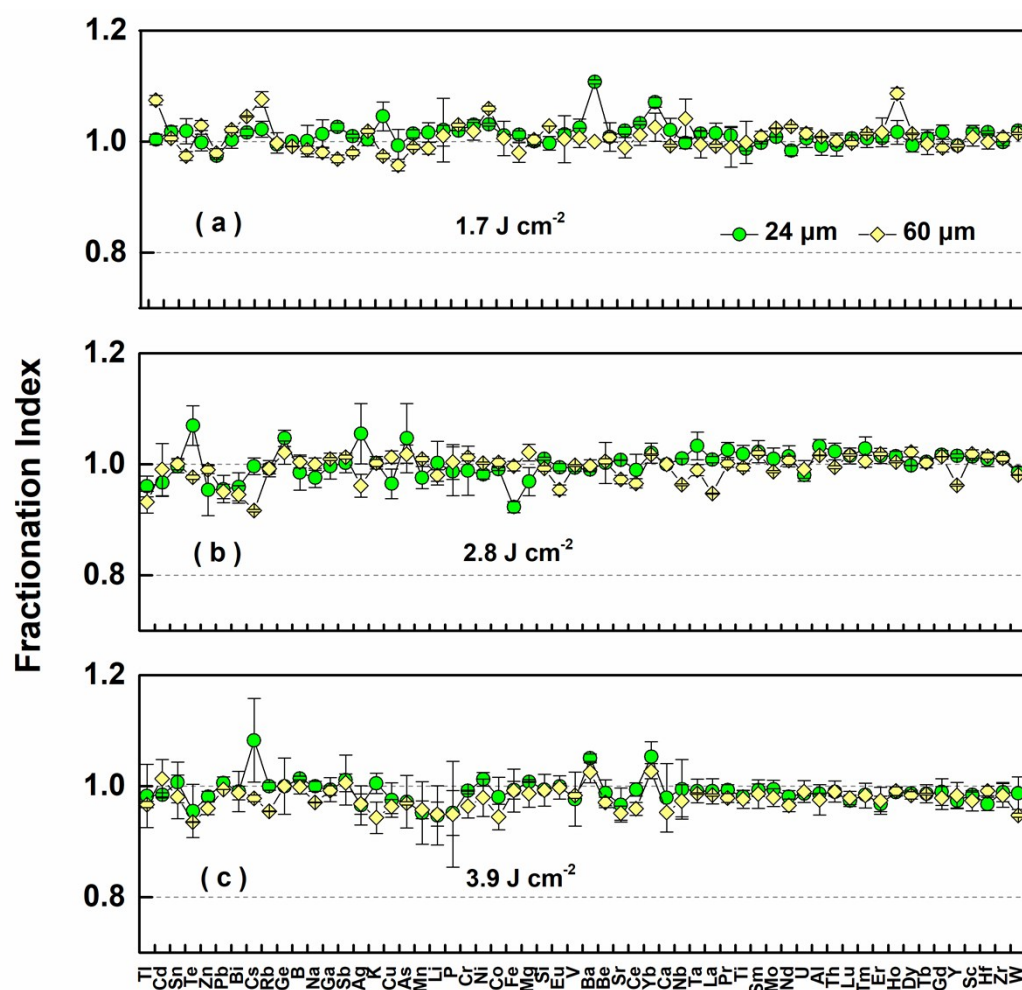

SFig 1. The Ca-normalized fractionation indices (FIs) by femtosecond laser ablation of NIST 610 at different fluences. (a):  $1.7 \text{ J cm}^{-2}$ ; (b):  $2.8 \text{ J cm}^{-2}$ ; (c):  $3.9 \text{ J cm}^{-2}$ . Error bars represent the standard deviation (1 s) from three measurements.
